# Supplementary material for: Cardiovascular Outcomes according to Comorbidities and Low-Density Lipoprotein Cholesterol in Korean People with Type 2 Diabetes Mellitus
Source: PubMed Central journal article supplement — Diabetes Metab J. 2023 Jan 26;47(1):45–58. doi: 10.4093/dmj.2021.0344 (PMC9925148; doi:10.4093/dmj.2021.0344), 2023-01-26
Supplement: dmj-2021-0344-Supplementary-Fig-1.pdf [file dmj-2021-0344-Supplementary-Fig-1.pdf]

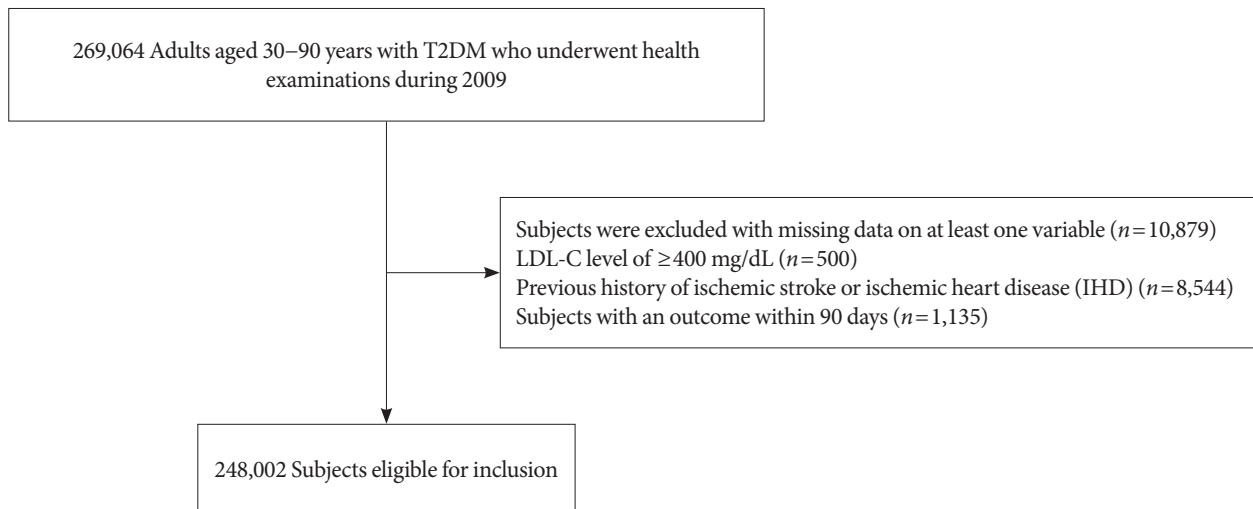

**Supplementary Fig. 1.** Flow chart of the study population. T2DM, type 2 diabetes mellitus; LDL-C, low-density lipoprotein cholesterol.
