# Supplementary material for: Cardiovascular Outcomes according to Comorbidities and Low-Density Lipoprotein Cholesterol in Korean People with Type 2 Diabetes Mellitus
Source: PubMed Central journal article supplement — Diabetes Metab J. 2023 Jan 26;47(1):45–58. doi: 10.4093/dmj.2021.0344 (PMC9925148; doi:10.4093/dmj.2021.0344), 2023-01-26
Supplement: dmj-2021-0344-Supplementary-Table-1.pdf [file dmj-2021-0344-Supplementary-Table-1.pdf]

**Supplementary Table 1.** Baseline characteristics of study population according to comorbidities

| Characteristic                   | CKD                      |                           | HT                       |                           | Obesity                   |                           | DM ≥ 5 years              |                           |
|----------------------------------|--------------------------|---------------------------|--------------------------|---------------------------|---------------------------|---------------------------|---------------------------|---------------------------|
|                                  | No                       | Yes                       | No                       | Yes                       | No                        | Yes                       | No                        | Yes                       |
| Number                           | 184,316                  | 63,686                    | 88,225                   | 159,777                   | 130,509                   | 117,493                   | 102,810                   | 145,192                   |
| Age, yr                          | 56.49±9.96               | 68.7±8                    | 55.75±10.95              | 61.76±10.26               | 60.49±10.77               | 58.66±10.95               | 57.35±11.43               | 61.23±10.2                |
| Male sex                         | 115,652 (62.75)          | 26,914 (42.26)            | 53,998 (61.2)            | 88,568 (55.43)            | 77,133 (59.1)             | 65,433 (55.69)            | 61,006 (59.34)            | 81,560 (56.17)            |
| BMI, kg/m <sup>2</sup>           | 25.47±3.23               | 23.54±2.94                | 24.2±3.05                | 25.4±3.3                  | 22.58±1.75                | 27.63±2.39                | 25.28±3.38                | 24.75±3.16                |
| SBP, mm Hg                       | 128.36±15.39             | 129.76±16.7               | 120.32±10.84             | 133.36±16.11              | 127±15.89                 | 130.63±15.37              | 128.42±15.6               | 128.93±15.85              |
| DBP, mm Hg                       | 78.83±9.91               | 77.23±10.34               | 74.42±7.65               | 80.62±10.52               | 77.2±9.99                 | 79.77±9.93                | 79.15±10.1                | 77.9±9.98                 |
| GLU, mg/dL                       | 144.21±53.45             | 135.37±53.02              | 146.93±58.16             | 139.18±50.49              | 143.14±56.56              | 140.6±49.8                | 136.42±52.36              | 145.84±53.92              |
| eGFR, mL/min/1.73 m <sup>2</sup> | 87.5±26.62               | 47.51±9.66                | 81.95±28.11              | 74.62±29.55               | 69.48±24.62               | 85.83±31.5                | 82.03±30.2                | 73.83±28.07               |
| Total cholesterol, mg/dL         | 193.43±41.4              | 192.04±43.09              | 195.16±41.28             | 191.92±42.11              | 191.31±41.79              | 195.03±41.82              | 197.56±42.55              | 189.9±41.05               |
| TG, mg/dL                        | 145.88<br>(145.5-146.27) | 135.92<br>(135.35-136.49) | 136.17<br>(135.65-136.7) | 147.33<br>(146.92-147.73) | 131.88<br>(131.47-132.29) | 157.05<br>(156.55-157.54) | 148.64<br>(148.12-149.17) | 139.56<br>(139.16-139.97) |
| HDL-C, mg/dL                     | 52.13±29.45              | 52.34±30.32               | 52.63±30.02              | 51.93±29.49               | 53.25±30.93               | 51±28.18                  | 52.52±29.67               | 51.94±29.69               |
| LDL-C, mg/dL                     | 107.79±37.74             | 109.26±38.04              | 111.19±36.97             | 106.5±38.19               | 108.01±37.34              | 108.35±38.35              | 110.81±38.73              | 106.3±37.05               |
| Duration of diabetes ≥ 5 years   | 101,891 (55.28)          | 43,301 (67.99)            | 47,475 (53.81)           | 97,717 (61.16)            | 80,692 (61.83)            | 64,500 (54.9)             |                           |                           |
| Current smoking                  | 46,896 (25.44)           | 8,177 (12.84)             | 23,686 (26.85)           | 31,387 (19.64)            | 31,090 (23.82)            | 23,983 (20.41)            | 25,530 (24.83)            | 29,543 (20.35)            |
| Alcohol intake                   |                          |                           |                          |                           |                           |                           |                           |                           |
| Non-drinker                      | 105,444 (57.21)          | 50,167 (78.77)            | 53,736 (60.91)           | 101,875 (63.76)           | 82,213 (62.99)            | 73,398 (62.47)            | 60,918 (59.25)            | 94,693 (65.22)            |
| Mild drinker <sup>a</sup>        | 60,600 (32.88)           | 11,226 (17.63)            | 27,407 (31.06)           | 44,419 (27.8)             | 37,949 (29.08)            | 33,877 (28.83)            | 32,102 (31.22)            | 39,724 (27.36)            |
| Heavy drinker                    | 18,272 (9.91)            | 2,293 (3.6)               | 7,082 (8.03)             | 13,483 (8.44)             | 10,347 (7.93)             | 10,218 (8.7)              | 9,790 (9.52)              | 10,775 (7.42)             |
| Regular physical activity        | 44,823 (24.32)           | 12,968 (20.36)            | 20,999 (23.8)            | 36,792 (23.03)            | 31,486 (24.13)            | 26,305 (22.39)            | 22,478 (21.86)            | 35,313 (24.32)            |
| Statin use                       | 65,410 (35.49)           | 23,726 (37.25)            | 25,055 (28.4)            | 64,081 (40.11)            | 42,164 (32.31)            | 46,972 (39.98)            | 36,224 (35.23)            | 52,912 (36.44)            |

Values are presented as mean ± standard deviation, number (%), or median (interquartile range). Risk factors: age (male ≥ 45 years, female ≥ 55 years), family history of cardiovascular disease, HT (systolic blood pressure ≥ 140 mm Hg or diastolic blood pressure ≥ 90 mm Hg or taking antihypertensive drugs), current smoking, low high-density lipoprotein cholesterol (< 40 mg/dL). CKD, chronic kidney disease; HT, hypertension; DM, diabetes mellitus; BMI, body mass index; SBP, systolic blood pressure; DBP, diastolic blood pressure; GLU, glucose; eGFR, estimated glomerular filtration rate; TG, triglyceride; HDL-C, high-density lipoprotein cholesterol; LDL-C, low-density lipoprotein cholesterol.

<sup>a</sup>Mild drinkers; daily alcohol intake < 30 g/day; heavy drinkers; daily alcohol intake ≥ 30 g/day.
