# Supplementary material for: Cardiovascular Outcomes according to Comorbidities and Low-Density Lipoprotein Cholesterol in Korean People with Type 2 Diabetes Mellitus
Source: PubMed Central journal article supplement — Diabetes Metab J. 2023 Jan 26;47(1):45–58. doi: 10.4093/dmj.2021.0344 (PMC9925148; doi:10.4093/dmj.2021.0344), 2023-01-26
Supplement: dmj-2021-0344-Supplementary-Table-2.pdf [file dmj-2021-0344-Supplementary-Table-2.pdf]

**Supplementary Table 2.** Incidence rate and risk of CVD according to LDL-C levels depending on statin treatment

| Outcome   | LDL-C, mg/dL       | Total |                  | Statin nonuser (n=158,866) |                  | Statin user (n=89,136) |                  | Statin nonuser at event <sup>a</sup> |                  |
|-----------|--------------------|-------|------------------|----------------------------|------------------|------------------------|------------------|--------------------------------------|------------------|
|           |                    | IR    | HR (95% CI)      | IR                         | HR (95% CI)      | IR                     | HR (95% CI)      | IR                                   | HR (95% CI)      |
| Composite | <70                | 9.15  | 1 (reference)    | 9.25                       | 1 (reference)    | 9.08                   | 1 (reference)    | 8.46                                 | 1 (reference)    |
|           | 70–<100            | 9.75  | 1.12 (1.07–1.17) | 9.84                       | 1.13 (1.06–1.21) | 9.63                   | 1.12 (1.05–1.19) | 9.25                                 | 1.16 (1.07–1.26) |
|           | 100–<130           | 10.08 | 1.20 (1.15–1.26) | 10.07                      | 1.21 (1.13–1.29) | 10.12                  | 1.22 (1.14–1.31) | 9.68                                 | 1.26 (1.17–1.36) |
|           | 130–<160           | 10.89 | 1.32 (1.26–1.39) | 10.96                      | 1.33 (1.24–1.43) | 10.70                  | 1.34 (1.24–1.44) | 10.49                                | 1.38 (1.27–1.5)  |
|           | 160–<190           | 11.79 | 1.46 (1.37–1.55) | 12.30                      | 1.50 (1.38–1.64) | 11.12                  | 1.43 (1.30–1.57) | 11.91                                | 1.58 (1.41–1.76) |
|           | ≥190               | 13.38 | 1.65 (1.51–1.80) | 15.84                      | 1.91 (1.69–2.16) | 11.42                  | 1.45 (1.28–1.64) | 15.96                                | 2.07 (1.76–2.43) |
|           | <i>P</i> for trend |       | <0.001           |                            | <0.001           |                        | <0.001           |                                      | <0.001           |
| MI        | <70                | 3.04  | 1 (reference)    | 2.93                       | 1 (reference)    | 3.13                   | 1 (reference)    | 2.43                                 | 1 (reference)    |
|           | 70–<100            | 3.27  | 1.17 (1.08–1.27) | 2.99                       | 1.11 (0.99–1.25) | 3.68                   | 1.27 (1.14–1.41) | 2.60                                 | 1.16 (1.01–1.35) |
|           | 100–<130           | 3.43  | 1.29 (1.19–1.40) | 3.31                       | 1.29 (1.15–1.45) | 3.76                   | 1.33 (1.19–1.49) | 2.98                                 | 1.4 (1.22–1.62)  |
|           | 130–<160           | 3.7   | 1.42 (1.30–1.54) | 3.75                       | 1.49 (1.32–1.67) | 3.55                   | 1.29 (1.13–1.47) | 3.25                                 | 1.56 (1.34–1.81) |
|           | 160–<190           | 4.56  | 1.77 (1.60–1.96) | 4.76                       | 1.91 (1.65–2.20) | 4.30                   | 1.62 (1.40–1.89) | 4.50                                 | 2.20 (1.82–2.65) |
|           | ≥190               | 5.37  | 2.03 (1.77–2.33) | 6.38                       | 2.50 (2.06–3.04) | 4.55                   | 1.69 (1.39–2.06) | 5.89                                 | 2.83 (2.16–3.71) |
|           | <i>P</i> for trend |       | <0.001           |                            | <0.001           |                        | <0.001           |                                      | <0.001           |
| Stroke    | <70                | 6.49  | 1 (reference)    | 6.62                       | 1 (reference)    | 6.38                   | 1 (reference)    | 6.24                                 | 1 (reference)    |
|           | 70–<100            | 6.82  | 1.09 (1.03–1.15) | 7.15                       | 1.14 (1.05–1.23) | 6.34                   | 1.03 (0.96–1.12) | 6.85                                 | 1.15 (1.05–1.26) |
|           | 100–<130           | 6.99  | 1.14 (1.08–1.21) | 7.10                       | 1.17 (1.08–1.26) | 6.68                   | 1.13 (1.04–1.23) | 6.89                                 | 1.20 (1.10–1.31) |
|           | 130–<160           | 7.61  | 1.26 (1.19–1.34) | 7.64                       | 1.27 (1.17–1.38) | 7.53                   | 1.32 (1.21–1.45) | 7.44                                 | 1.30 (1.18–1.43) |
|           | 160–<190           | 7.75  | 1.31 (1.22–1.42) | 8.00                       | 1.32 (1.19–1.47) | 7.42                   | 1.34 (1.20–1.50) | 7.69                                 | 1.34 (1.17–1.53) |
|           | ≥190               | 8.49  | 1.45 (1.30–1.61) | 10.02                      | 1.64 (1.41–1.91) | 7.25                   | 1.30 (1.12–1.51) | 10.35                                | 1.76 (1.45–2.14) |
|           | <i>P</i> for trend |       | <0.001           |                            | <0.001           |                        | <0.001           |                                      | <0.001           |

CVD, cardiovascular disease; LDL-C, low-density lipoprotein cholesterol; IR, incidence rate; HR, hazard ratio; CI, confidence interval; MI, myocardial infarction.

<sup>a</sup>Statin nonuser at event: Among the non-statin users at baseline (n=158,866), those who were prescribed statins during the follow-up period were dropped out. The events that occurred before taking statins were included in the analysis, and those that occurred after taking statins were excluded. Finally, a total of 89,773 people was dropped out during the follow-up period.
