# Supplementary material for: Cardiovascular Outcomes according to Comorbidities and Low-Density Lipoprotein Cholesterol in Korean People with Type 2 Diabetes Mellitus
Source: PubMed Central journal article supplement — Diabetes Metab J. 2023 Jan 26;47(1):45–58. doi: 10.4093/dmj.2021.0344 (PMC9925148; doi:10.4093/dmj.2021.0344), 2023-01-26
Supplement: dmj-2021-0344-Supplementary-Table-3.pdf [file dmj-2021-0344-Supplementary-Table-3.pdf]

**Supplementary Table 3.** Incidence rate and risk of CVD according to LDL-C levels among subgroups stratified by TG or HDL-C levels

| Outcome   | LDL-C, mg/dL       | Total |                  | TG <200 mg/dL |                  | TG ≥200 mg/dL |                  | HDL-C <40 mg/dL |                   | HDL-C ≥40 mg/dL |                  |
|-----------|--------------------|-------|------------------|---------------|------------------|---------------|------------------|-----------------|-------------------|-----------------|------------------|
|           |                    | IR    | HR (95% CI)      | IR            | HR (95% CI)      | IR            | HR (95% CI)      | IR              | HR (95% CI)       | IR              | HR (95% CI)      |
| Composite | <70                | 9.15  | 1 (reference)    | 9.11          | 1 (reference)    | 9.22          | 1 (reference)    | 9.90            | 1 (reference)     | 8.93            | 1 (reference)    |
|           | 70–<100            | 9.75  | 1.12 (1.07–1.17) | 9.38          | 1.07 (1.01–1.13) | 10.82         | 1.20 (1.11–1.29) | 12.00           | 1.21 (1.11–1.33)  | 9.21            | 1.09 (1.04–1.15) |
|           | 100–<130           | 10.08 | 1.20 (1.15–1.26) | 9.81          | 1.15 (1.09–1.22) | 11.02         | 1.25 (1.16–1.35) | 12.75           | 1.35 (1.23–1.49)  | 9.52            | 1.16 (1.10–1.22) |
|           | 130–<160           | 10.89 | 1.32 (1.26–1.39) | 10.30         | 1.24 (1.17–1.32) | 12.99         | 1.47 (1.35–1.61) | 13.64           | 1.44 (1.30–1.60)  | 10.38           | 1.29 (1.22–1.36) |
|           | 160–<190           | 11.79 | 1.46 (1.37–1.55) | 11.02         | 1.36 (1.26–1.47) | 14.29         | 1.64 (1.47–1.84) | 14.79           | 1.54 (1.34–1.78)  | 11.31           | 1.44 (1.34–1.54) |
|           | ≥190               | 13.38 | 1.65 (1.51–1.80) | 13.21         | 1.65 (1.49–1.83) | 13.79         | 1.57 (1.35–1.84) | 15.96           | 1.74 (1.42–2.13)  | 12.96           | 1.62 (1.47–1.78) |
|           | <i>P</i> for trend |       | <0.001           |               | <0.001           |               | <0.001           |                 | <0.001            |                 | <0.001           |
| MI        | <70                | 3.04  | 1 (reference)    | 3.01          | 1 (reference)    | 3.09          | 1 (reference)    | 3.66            | 1 (reference)     | 2.86            | 1 (reference)    |
|           | 70–<100            | 3.27  | 1.17 (1.08–1.27) | 3.07          | 1.08 (0.98–1.20) | 3.86          | 1.30 (1.14–1.48) | 4.41            | 1.27 (1.09–1.48)  | 2.99            | 1.14 (1.04–1.25) |
|           | 100–<130           | 3.43  | 1.29 (1.19–1.40) | 3.28          | 1.22 (1.11–1.35) | 3.91          | 1.36 (1.19–1.56) | 4.48            | 1.38 (1.19–1.62)  | 3.21            | 1.27 (1.16–1.39) |
|           | 130–<160           | 3.7   | 1.42 (1.30–1.54) | 3.53          | 1.35 (1.21–1.50) | 4.28          | 1.48 (1.28–1.72) | 4.99            | 1.54 (1.30–1.83)  | 3.46            | 1.39 (1.26–1.54) |
|           | 160–<190           | 4.56  | 1.77 (1.60–1.96) | 4.09          | 1.58 (1.39–1.80) | 6.07          | 2.13 (1.79–2.55) | 6.61            | 1.98 (1.60–2.46)  | 4.24            | 1.73 (1.54–1.95) |
|           | ≥190               | 5.37  | 2.03 (1.77–2.33) | 5.06          | 1.94 (1.64–2.31) | 6.13          | 2.09 (1.66–2.65) | 6.63            | 2.00 (1.46–2.74)  | 5.17            | 2.05 (1.76–2.38) |
|           | <i>P</i> for trend |       | <0.001           |               | <0.001           |               | <0.001           |                 | <0.001            |                 | <0.001           |
| Stroke    | <70                | 6.49  | 1 (reference)    | 6.47          | 1 (reference)    | 6.51          | 1 (reference)    | 6.81            | 1 (reference)     | 6.39            | 1 (reference)    |
|           | 70–<100            | 6.82  | 1.09 (1.03–1.15) | 6.64          | 1.05 (0.98–1.12) | 7.35          | 1.13 (1.03–1.24) | 8.03            | 1.14 (1.029–1.28) | 6.53            | 1.07 (1.00–1.14) |
|           | 100–<130           | 6.99  | 1.14 (1.08–1.21) | 6.85          | 1.11 (1.03–1.19) | 7.46          | 1.18 (1.07–1.29) | 8.66            | 1.28 (1.14–1.43)  | 6.64            | 1.11 (1.04–1.18) |
|           | 130–<160           | 7.61  | 1.26 (1.19–1.34) | 7.17          | 1.19 (1.10–1.28) | 9.18          | 1.44 (1.30–1.60) | 9.21            | 1.35 (1.19–1.53)  | 7.32            | 1.24 (1.16–1.33) |
|           | 160–<190           | 7.75  | 1.31 (1.22–1.42) | 7.39          | 1.25 (1.14–1.38) | 8.92          | 1.41 (1.23–1.62) | 8.85            | 1.28 (1.07–1.53)  | 7.58            | 1.31 (1.21–1.43) |
|           | ≥190               | 8.49  | 1.45 (1.30–1.61) | 8.63          | 1.50 (1.32–1.70) | 8.14          | 1.29 (1.06–1.57) | 9.66            | 1.49 (1.15–1.93)  | 8.30            | 1.43 (1.27–1.61) |
|           | <i>P</i> for trend |       | <0.001           |               | <0.001           |               | <0.001           |                 | <0.001            |                 | <0.001           |

CVD, cardiovascular disease; LDL-C, low-density lipoprotein cholesterol; TG, triglyceride; HDL-C, high-density lipoprotein cholesterol; IR, incidence rate; HR, hazard ratio; CI, confidence interval; MI, myocardial infarction.
