# Supplementary material for: Cardiovascular Outcomes according to Comorbidities and Low-Density Lipoprotein Cholesterol in Korean People with Type 2 Diabetes Mellitus
Source: PubMed Central journal article supplement — Diabetes Metab J. 2023 Jan 26;47(1):45–58. doi: 10.4093/dmj.2021.0344 (PMC9925148; doi:10.4093/dmj.2021.0344), 2023-01-26
Supplement: dmj-2021-0344-Supplementary-Table-4.pdf [file dmj-2021-0344-Supplementary-Table-4.pdf]

**Supplementary Table 4.** Incidence rate and risk of CVD according to LDL-C levels by different age groups

| Outcome   | LDL-C,<br>mg/dL    | Total |                  | Age <40 years<br>(n=8,471) |                  | 40≤age≤75 years<br>(n=223,438) |                  | Age >75 years<br>(n=16,093) |                  |
|-----------|--------------------|-------|------------------|----------------------------|------------------|--------------------------------|------------------|-----------------------------|------------------|
|           |                    | IR    | HR (95% CI)      | IR                         | HR (95% CI)      | IR                             | HR (95% CI)      | IR                          | HR (95% CI)      |
| Composite | <70                | 9.15  | 1 (reference)    | 2.09                       | 1 (reference)    | 8.70                           | 1 (reference)    | 24.59                       | 1 (reference)    |
|           | 70–<100            | 9.75  | 1.12 (1.07–1.17) | 1.85                       | 1.17 (0.69–1.98) | 9.17                           | 1.13 (1.08–1.19) | 25.03                       | 1.07 (0.94–1.21) |
|           | 100–<130           | 10.08 | 1.20 (1.15–1.26) | 2.15                       | 1.41 (0.85–2.35) | 9.43                           | 1.21 (1.15–1.27) | 26.95                       | 1.17 (1.03–1.33) |
|           | 130–<160           | 10.89 | 1.32 (1.26–1.39) | 1.78                       | 1.12 (0.62–2.00) | 10.16                          | 1.34 (1.27–1.41) | 28.89                       | 1.27 (1.10–1.45) |
|           | 160–<190           | 11.79 | 1.46 (1.37–1.55) | 2.81                       | 1.83 (0.93–3.60) | 11.03                          | 1.49 (1.40–1.60) | 29.69                       | 1.29 (1.09–1.53) |
|           | ≥190               | 13.38 | 1.65 (1.51–1.80) | 4.21                       | 2.31 (1.03–5.17) | 12.75                          | 1.71 (1.56–1.88) | 30.66                       | 1.31 (1.03–1.68) |
|           | <i>P</i> for trend |       | <0.001           |                            | 0.0582           |                                | <.0001           |                             | <.0001           |
| MI        | <70                | 3.04  | 1 (reference)    | 1.21                       | 1 (reference)    | 2.95                           | 1 (reference)    | 6.44                        | 1 (reference)    |
|           | 70–<100            | 3.27  | 1.17 (1.08–1.27) | 1.16                       | 1.21 (0.61–2.38) | 3.09                           | 1.16 (1.06–1.26) | 7.69                        | 1.28 (1.01–1.63) |
|           | 100–<130           | 3.43  | 1.29 (1.19–1.40) | 1.21                       | 1.28 (0.66–2.50) | 3.26                           | 1.29 (1.19–1.41) | 7.66                        | 1.30 (1.02–1.66) |
|           | 130–<160           | 3.7   | 1.42 (1.30–1.54) | 1.07                       | 1.06 (0.50–2.26) | 3.57                           | 1.45 (1.33–1.59) | 7.25                        | 1.24 (0.95–1.61) |
|           | 160–<190           | 4.56  | 1.77 (1.60–1.96) | 1.80                       | 1.88 (0.80–4.46) | 4.19                           | 1.73 (1.55–1.93) | 11.99                       | 2.03 (1.52–2.71) |
|           | ≥190               | 5.37  | 2.03 (1.77–2.33) | 3.14                       | 2.81 (1.07–7.39) | 5.27                           | 2.12 (1.83–2.45) | 8.51                        | 1.38 (0.88–2.17) |
|           | <i>P</i> for trend |       | <0.001           |                            | 0.111            |                                | <.0001           |                             | 0.0006           |
| Stroke    | <70                | 6.49  | 1 (reference)    | 0.95                       | 1 (reference)    | 6.10                           | 1 (reference)    | 19.17                       | 1 (reference)    |
|           | 70–<100            | 6.82  | 1.09 (1.03–1.15) | 0.82                       | 1.18 (0.54–2.58) | 6.39                           | 1.11 (1.04–1.17) | 18.12                       | 0.98 (0.85–1.14) |
|           | 100–<130           | 6.99  | 1.14 (1.08–1.21) | 1.05                       | 1.57 (0.75–3.32) | 6.47                           | 1.15 (1.08–1.22) | 20.06                       | 1.10 (0.95–1.28) |
|           | 130–<160           | 7.61  | 1.26 (1.19–1.34) | 0.78                       | 1.12 (0.47–2.66) | 6.97                           | 1.27 (1.19–1.36) | 22.56                       | 1.25 (1.07–1.46) |
|           | 160–<190           | 7.75  | 1.31 (1.22–1.42) | 1.00                       | 1.47 (0.50–4.35) | 7.32                           | 1.38 (1.27–1.50) | 18.79                       | 1.03 (0.84–1.27) |
|           | ≥190               | 8.49  | 1.45 (1.30–1.61) | 1.56                       | 1.91 (0.53–6.93) | 7.86                           | 1.48 (1.32–1.66) | 24.01                       | 1.32 (1.00–1.74) |
|           | <i>P</i> for trend |       | <0.001           |                            | 0.3393           |                                | <.0001           |                             | 0.0032           |

CVD, cardiovascular disease; LDL-C, low-density lipoprotein cholesterol; IR, incidence rate; HR, hazard ratio; CI, confidence interval; MI, myocardial infarction.
