# Supplementary material for: Cardiovascular Outcomes according to Comorbidities and Low-Density Lipoprotein Cholesterol in Korean People with Type 2 Diabetes Mellitus
Source: PubMed Central journal article supplement — Diabetes Metab J. 2023 Jan 26;47(1):45–58. doi: 10.4093/dmj.2021.0344 (PMC9925148; doi:10.4093/dmj.2021.0344), 2023-01-26
Supplement: dmj-2021-0344-Supplementary-Table-5.pdf [file dmj-2021-0344-Supplementary-Table-5.pdf]

**Supplementary Table 5.** Incidence rate (confidence interval) of cardiovascular disease according to risk levels

| Per 1,000 person-years | Low risk         | Moderate risk    | High risk           | Very high risk      | DM                  |
|------------------------|------------------|------------------|---------------------|---------------------|---------------------|
| Composite <sup>a</sup> | 1.34 (1.33–1.35) | 5.46 (5.41–5.51) | 10.39 (10.25–10.53) | 14.06 (13.63–14.51) | 10.19 (10.05–10.32) |
| MI                     | 0.45 (0.44–0.46) | 1.93 (1.90–1.96) | 3.57 (3.49–3.65)    | 3.58 (3.37–3.80)    | 3.49 (3.42–3.57)    |
| Stroke                 | 0.92 (0.91–0.93) | 3.67 (3.63–3.71) | 7.20 (7.08–7.32)    | 10.57 (10.20–10.95) | 7.07 (6.96–7.18)    |

Low risk: having one or fewer major cardiovascular (CV) risk factor (age [male  $\geq 45$  years, female  $\geq 55$  years], family history of premature atherosclerotic cardiovascular disease, hypertension, smoking, and low high-density lipoprotein cholesterol level); Moderate risk: subjects with two or more major CV risk factors; High risk: subjects with significant carotid artery stenosis, abdominal aortic aneurysm, or diabetes mellitus; Very high risk: having coronary artery disease, atherosclerotic stroke, transient ischemic attack, or peripheral artery disease.

DM, diabetes mellitus; MI, myocardial infarction.

<sup>a</sup>Composite, composite outcome of myocardial infarction and ischemic stroke.
